# Supplementary material for: Specificity Studies of the Venezuelan Equine Encephalitis Virus Non-Structural Protein 2 Protease Using Recombinant Fluorescent Substrates
Source: Int J Mol Sci. 2020 Oct 16;21(20):7686. doi: 10.3390/ijms21207686 (PMC7593941; doi:10.3390/ijms21207686)
Supplement: Supplementary file 1 [file ijms-21-07686-s001.zip]

Archive with 5 entries (5 files):
- Table S2.pdf
- Table S1.pdf
- Figure S1.pdf
- Figure S2.pdf
- Figure S3.pdf
