# Supplementary material for: Specificity Studies of the Venezuelan Equine Encephalitis Virus Non-Structural Protein 2 Protease Using Recombinant Fluorescent Substrates
Source: Int J Mol Sci. 2020 Oct 16;21(20):7686. doi: 10.3390/ijms21207686 (PMC7593941; doi:10.3390/ijms21207686)
Supplement: Supplementary file 1 [file ijms-21-07686-s001.zip › Figure S1.pdf]

**Figure S1.** Alignment of five alphavirus nsP2 sequences. Sequence of VEEV nsP2pro-2 is bold, while sequence of VEEV nsP2pro-1 is underlined. Residues of 436-457 positions are marked with yellow. Some positions of VEEV sequence that are mentioned in the main text are labeled.

[illegible]
