# Supplementary material for: Specificity Studies of the Venezuelan Equine Encephalitis Virus Non-Structural Protein 2 Protease Using Recombinant Fluorescent Substrates
Source: Int J Mol Sci. 2020 Oct 16;21(20):7686. doi: 10.3390/ijms21207686 (PMC7593941; doi:10.3390/ijms21207686)
Supplement: Supplementary file 1 [file ijms-21-07686-s001.zip › Table S1.pdf]

**Table S1.** Oligonucleotide primers used for the generation and sequencing of expression plasmids coding for VEEV nsP2 and nsP2pro-2. PE2285, PE2286, PE2287, and PE2288 primers were used to sequence the C-terminal, while PE2730 and PE2731 were applied to sequence the N-terminal domain of VEEV nsP2. Primer N2, N1, and C are referring to the nomenclature used by Tropea *et al.* [27]. FWD =forward, REV=reverse. Primer used for sequencing are marked with asterisks.

| Code   | Primer Description  | Sequence                                                                  |
|--------|---------------------|---------------------------------------------------------------------------|
| PE2685 | N1 - VEEV nsP2      | 5'-GGCTCGGAGAACCTGTACTTCCAGGGCTCAGTGGA-GACACCTCGTG-3'                     |
| PE2687 | N1 - VEEV nsp2pro-2 | 5'-GGCTCGGAGAACCTGTACTTCCAGGCCAAGTACCCTGGGAATTTCACT-3'                    |
| PE2686 | C                   | 5'-GGGGACCACCTTTGTACAAGAAAGCTGGGTTATTAT-GTATAAATGTTGGTCAAGGTTGATGAAAGC-3' |
| PE277  | N2                  | 5'-GGGGACAAGTTTGTACAAAAAAGCAGGCTCGGAGA-ACCTGTACTTCCAG-3'                  |
| PE2285 | FWD*                | 5'- ATGCGTGAGGTTCTTTGGAC-3'                                               |
| PE2286 | FWD*                | 5'-CAGCAGTGTGAAGACCATGC-3'                                                |
| PE2287 | REV*                | 5'-AGGACAGTTCTGCCCTTCAA-3'                                                |
| PE2288 | REV*                | 5'-TTGGTCAAGGTTGATGAAAGC-3'                                               |
| PE2730 | FWD*                | 5'-CCTTCATGAATTCGCCTAC-3'                                                 |
| PE2731 | FWD*                | 5'-AACGACGAATCCGAAAGAGA-3'                                                |
