# Supplementary material for: Specificity Studies of the Venezuelan Equine Encephalitis Virus Non-Structural Protein 2 Protease Using Recombinant Fluorescent Substrates
Source: Int J Mol Sci. 2020 Oct 16;21(20):7686. doi: 10.3390/ijms21207686 (PMC7593941; doi:10.3390/ijms21207686)
Supplement: Supplementary file 1 [file ijms-21-07686-s001.zip › Table S2.pdf]

**Table S2.** List of the chemically synthesized oligonucleotide primers. The primers that were applied for the generation of pDEST-His<sub>6</sub>-MBP-mEYFP expression plasmids coding for the wild-type, P5, P4, P1, P2 and P1' variants of SFV nsP12 (EYHAGA↓GVVETP) cleavage site sequence are listed. Modified cleavage site residues are bold and red. FWD=forward, REV =reverse.

| Cleavage site sequence | Oligonucleotide primers                                                                                            |
|------------------------|--------------------------------------------------------------------------------------------------------------------|
| EYHAGA↓GVVETP          | FWD:5'-TAAAGAATATCATGCTGGTGCTGGTGTGTTGAAACACCGG-3'<br>REV:5'-CTAGCCGGTGTTTCAACAACACCAGCACCAGCATGATATTCTTTAAT-3'    |
| EYHAGA↓ <b>Y</b> VVETP | FWD:5'-TAAAGAATATCATGCTGGTGCTTATGTTGTTGAAACACCGG-3'<br>REV:5'-CTAGCCGGTGTTTCAACAACATAAGCACCAGCATGATATTCTTTAAT-3'   |
| EYHAGA↓ <b>I</b> VVETP | FWD:5'-TAAAGAATATCATGCTGGTGCTATTGTTGTTGAAACACCGG-3'<br>REV:5'-CTAGCCGGTGTTTCAACAACAATAGCACCAGCATGATATTCTTTAAT-3'   |
| EYHAGA↓ <b>Q</b> VVETP | FWD:5'-TAAAGAATATCATGCTGGTGCTCAGTTGTTGAAACACCGG-3'<br>REV:5'-CTAGCCGGTGTTTCAACAACCTGAGCACCAGCATGATATTCTTTAAT-3'    |
| EYHAGA↓ <b>N</b> VVETP | FWD:5'-TAAAGAATATCATGCTGGTGCTAACGTTGTTGAAACACCGG-3'<br>REV:5'-CTAGCCGGTGTTTCAACAACGTTAGCACCAGCATGATATTCTTTAAT-3'   |
| EYHAGA↓ <b>D</b> VVETP | FWD:5'-TAAAGAATATCATGCTGGTGCTGATGTTGTTGAAACACCGG-3'<br>REV:5'-CTAGCCGGTGTTTCAACAACATCAGCACCAGCATGATATTCTTTAAT-3'   |
| EYHAGA↓ <b>A</b> VVETP | FWD:5'-TAAAGAATATCATGCTGGTGCTGCGGTTGTTGAAACACCGG-3'<br>REV:5'-CTAGCCGGTGTTTCAACAACCGCAGCACCAGCATGATATTCTTTAAT-3'   |
| EYHAGA↓ <b>M</b> VVETP | FWD:5'-TAAAGAATATCATGCTGGTGCTATGGTTGTTGAAACACCGG-3'<br>REV:5'-CTAGCCGGTGTTTCAACAACCATAGCACCAGCATGATATTCTTTAAT-3'   |
| EYHAGA↓ <b>W</b> VVETP | FWD:5'-TAAAGAATATCATGCTGGTGCTTGGGTTGTTGAAACACCGG-3'<br>REV:5'-CTAGCCGGTGTTTCAACAACCCAAGCACCAGCATGATATTCTTTAAT-3'   |
| EYHAGA↓ <b>F</b> VVETP | FWD:5'-TAAAGAATATCATGCTGGTGCTTTTGTGTTGAAACACCGG-3'<br>REV:5'-CTAGCCGGTGTTTCAACAACAAAAGCACCAGCATGATATTCTTTAAT-3'    |
| <b>E</b> QHAGA↓GVVETP  | FWD:5'-TAAAGAACAGCATGCTGGTGCTGGTGTGTTGTTGAAACACCGG-3'<br>REV:5'-CTAGCCGGTGTTTCAACAACACCAGCACCAGCATGCTGTTCTTTAAT-3' |
| EY <b>E</b> AGA↓GVVETP | FWD:5'-TAAAGAATATGAAGCTGGTGCTGGTGTGTTGTTGAAACACCGG-3'<br>REV:5'-CTAGCCGGTGTTTCAACAACACCAGCACCAGCTTCATATTCTTTAAT-3' |
| EY <b>T</b> AGA↓GVVETP | FWD:5'-TAAAGAATATACCGCTGGTGCTGGTGTGTTGTTGAAACACCGG-3'<br>REV:5'-CTAGCCGGTGTTTCAACAACACCAGCACCAGCGGTATATTCTTTAAT-3' |
| EY <b>R</b> AGA↓GVVETP | FWD:5'-TAAAGAATATCGCGCTGGTGCTGGTGTGTTGTTGAAACACCGG-3'<br>REV:5'-CTAGCCGGTGTTTCAACAACACCAGCACCAGCGCATATTCTTTAAT-3'  |
| EY <b>G</b> AGA↓GVVETP | FWD:5'-TAAAGAATATGGTGCTGGTGCTGGTGTGTTGTTGAAACACCGG-3'<br>REV:5'-CTAGCCGGTGTTTCAACAACACCAGCACCAGCACCATATTCTTTAAT-3' |
| EYH <b>A</b> A↓GVVETP  | FWD:5'-TAAAGAATATCATGCTGCTGCTGGTGTGTTGTTGAAACACCGG-3'<br>REV:5'-CTAGCCGGTGTTTCAACAACACCAGCAGCAGCATGATATTCTTTAAT-3' |
| EYH <b>A</b> V↓GVVETP  | FWD:5'-TAAAGAATATCATGCTGTGGCTGGTGTGTTGTTGAAACACCGG-3'<br>REV:5'-CTAGCCGGTGTTTCAACAACACCAGCCACAGCATGATATTCTTTAAT-3' |
| EYHAG <b>G</b> ↓GVVETP | FWD:5'-TAAAGAATATCATGCTGGTGGTGGTGTGTTGTTGAAACACCGG-3'<br>REV:5'-CTAGCCGGTGTTTCAACAACACCACCACCAGCATGATATTCTTTAAT-3' |
| EYHAG <b>V</b> ↓GVVETP | FWD:5'-TAAAGAATATCATGCTGGTGTGGTGTGTTGTTGAAACACCGG-3'<br>REV:5'-CTAGCCGGTGTTTCAACAACACCAACACCAGCATGATATTCTTTAAT-3'  |
| EYHAGA↓ <b>P</b> VVETP | FWD:5'-TAAAGAATATCATGCTGGTGCTGGTCCGGTTGAAACACCGG-3'<br>REV:5'-CTAGCCGGTGTTTCAACCGGACCAGCACCAGCATGATATTCTTTAAT-3'   |
| EYHAGA↓ <b>S</b> VVETP | FWD:5'-TAAAGAATATCATGCTGGTGCTGGTAGCGTTGAAACACCGG-3'<br>REV:5'-CTAGCCGGTGTTTCAACCGTACCAGCACCAGCATGATATTCTTTAAT-3'   |
